# Supplementary material for: Comprehensive, comparative evaluation of 25 automated SARS-CoV-2 serology assays
Source: PubMed Central journal article supplement (PMC10783060; doi:10.1128/spectrum.03228-23), 2023-11-29
Supplement: reviewer-comments.pdf [file reviewer-comments.pdf]

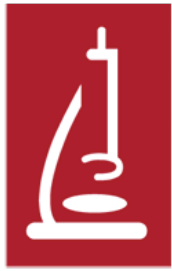

AMERICAN  
SOCIETY FOR  
MICROBIOLOGY

# Microbiology Spectrum

## Comprehensive, Comparative Evaluation of 25 Automated SARS-CoV-2 Serology Assays

Wayne Dimech, Shannon Curley, and JingJing Cai

*Corresponding Author(s): Wayne Dimech, National Reference Laboratory, Australia*

---

### Review Timeline:

|                     |                  |
|---------------------|------------------|
| Submission Date:    | August 31, 2023  |
| Editorial Decision: | October 3, 2023  |
| Revision Received:  | October 13, 2023 |
| Accepted:           | October 26, 2023 |

---

*Editor: Oliver Laeyendecker*

*Reviewer(s): Disclosure of reviewer identity is with reference to reviewer comments included in decision letter(s). The following individuals involved in review of your submission have agreed to reveal their identity: Adolfo Firpo-Betancourt (Reviewer #2)*

### Transaction Report:

(Note: With the exception of the correction of typographical or spelling errors that could be a source of ambiguity, letters and reports are not edited. The original formatting of letters and referee reports may not be reflected in this compilation.)

**DOI:** <https://doi.org/10.1128/spectrum.03228-23>

October 3, 2023

Dr. Wayne Dimech  
National Reference Laboratory, Australia  
4th Floor Healy Building  
41 Victoria Parade  
Fitzroy, Victoria 3065  
Australia

Re: Spectrum03228-23 (Comprehensive, Comparative Evaluation of 25 Automated SARS-CoV-2 Serology Assays)

Dear Dr. Wayne Dimech:

Thank you for submitting your manuscript to Microbiology Spectrum. When submitting the revised version of your paper, please provide (1) point-by-point responses to the issues raised by the reviewers as file type "Response to Reviewers," not in your cover letter, and (2) a PDF file that indicates the changes from the original submission (by highlighting or underlining the changes) as file type "Marked Up Manuscript - For Review Only". Please use this link to submit your revised manuscript - we strongly recommend that you submit your paper within the next 60 days or reach out to me. Detailed instructions on submitting your revised paper are below.

Link Not Available

Below you will find instructions from the Microbiology Spectrum editorial office and comments generated during the review.

ASM policy requires that data be available to the public upon online posting of the article, so please verify all links to sequence records, if present, and make sure that each number retrieves the full record of the data. If a new accession number is not linked or a link is broken, provide production staff with the correct URL for the record. If the accession numbers for new data are not publicly accessible before the expected online posting of the article, publication of your article may be delayed; please contact the ASM production staff immediately with the expected release date.

The ASM Journals program strives for constant improvement in our submission and publication process. Please tell us how we can improve your experience by taking this quick [Author Survey](#).

Sincerely,

Oliver Laeyendecker

Editor, Microbiology Spectrum

Journals Department  
American Society for Microbiology  
1752 N St., NW  
Washington, DC 20036  
E-mail: [spectrum@asmusa.org](mailto:spectrum@asmusa.org)

Reviewer comments:

Reviewer #1 (Comments for the Author):

Summary

This manuscript discusses the evaluation of COVID-19 serology test kits. Initially, rapid serology tests emerged following the recognition of the novel coronavirus (SARS-CoV-2) in November 2019, with limited regulatory oversight. The National Serology Reference Laboratory (NRL) in Australia conducted a comprehensive study to assess the performance of 16 IgG or Total antibody test kits.

Key findings from the evaluation include: Most test kits for detecting IgG or total antibodies exhibited good concordance with recent infection, with the Ortho VITROS Total kit performing exceptionally well. Test kits generally demonstrated high clinical

specificity, although there were slight variations, with some kits reporting lower specificity. Variability in analytical sensitivity was observed between test kits and sample dilutions, but no significant differences were found between different lot numbers of the same test kit. Some test kits showed cross-reactivity with certain substances, but most had low rates of false reactivity. The manuscript highlights the importance of rigorous evaluation protocols, especially during health emergencies, to ensure the reliability of diagnostic tests. It also emphasizes the need for improved regulatory standards and a network of expert laboratories to respond swiftly to future outbreaks.

#### Major Concerns

- Overall, the methods are vague. It seems there was likely an intention to cite previous work to save space in the manuscript but I don't see any citations in the methods.
  - o Study protocol, sample info (no citation), panels
- While the overall message that improved regulatory standards are needed as tests were created quickly, perhaps haphazardly, and pushed out under emergency use authorization remains the same, it is notable that the number of samples and the limited patient population largely impact the generalizability of the study. Given that in addition to the higher performing tests in this manuscript compared to the previous 35 assays studied, I would urge the authors to consider adding a reasonable amount of samples throughout the pandemic's variant waves.

#### Minor Concerns

- Limited patient population. 199 commercially acquired from non-hospitalized patients from the USA or Germany.
- Limited diversity of viral strains in samples due to limited timeframe of Jan to April of 2020. This lowers the generalizability of the results to an early stage of the pandemic.
- The discussion section should include a paragraph about study limitations that should include the two bullets above as well as others readers may not know from reading the manuscript.

#### Reviewer #2 (Comments for the Author):

Thank you for this excellent overview of major automated serological testing methods for relevant antibodies to SARS-CoV-2. It provides a useful and meaningful framework for assessing local real-life clinical laboratory medical practice experience employing any of these methods and instrument systems. It really puts in perspective the challenges of serological testing for infectious diseases which you have pointed out so clearly in your review published in 2021. It helps to answer frequent concerns with serological test results raised by clinicians and epidemiologists.

#### Specific comments on the content:

Check line 134 for possible spelling error: RTD for RDT?

Lines: 92-99 Cross-reacting and interfering substances.

I miss the specific analytical methods of assays with cross reactive results and the identification of the specific interfering substances affecting the assays mentioned in your discussion. Adding these to the tables would add value to clinical laboratory medicine practitioners.

Lines 119-120: "... the utility of these tests was unknown at the time.." There was no consensus on the proper utilization of the serological tests at a time when the real need was for a reliable diagnostic test. Promoting serological testing then was difficult because of the potential false negatives during early infection which would have been disastrous. It was clear from the start that seroprevalence would have been useful. If testing had been done earlier human to human transmission would have been recognized earlier. Another point on medical utility of serological testing early during a new epidemic is the selection of high immune responders (plasma with high antibody titers) as potential donors of convalescent plasma for treatment of severe COVID-19 patients. Another major concern then was the cost of serological testing as pointed out in your first reference (1). The potential benefits for serological testing are well described in your reference 19.

#### Staff Comments:

#### Preparing Revision Guidelines

To submit your modified manuscript, log onto the eJP submission site at <https://spectrum.msubmit.net/cgi-bin/main.plex>. Go to Author Tasks and click the appropriate manuscript title to begin the revision process. The information that you entered when you first submitted the paper will be displayed. Please update the information as necessary. Here are a few examples of required updates that authors must address:

- Point-by-point responses to the issues raised by the reviewers in a file named "Response to Reviewers," NOT IN YOUR COVER LETTER.
- Upload a compare copy of the manuscript (without figures) as a "Marked-Up Manuscript" file.
- Each figure must be uploaded as a separate file, and any multipanel figures must be assembled into one file.
- Manuscript: A .DOC version of the revised manuscript
- Figures: Editable, high-resolution, individual figure files are required at revision, TIFF or EPS files are preferred

For complete guidelines on revision requirements, please see the journal Submission and Review Process requirements at <https://journals.asm.org/journal/Spectrum/submission-review-process>. **Submissions of a paper that does not conform to Microbiology Spectrum guidelines will delay acceptance of your manuscript. "**

Please return the manuscript within 60 days; if you cannot complete the modification within this time period, please contact me. If you do not wish to modify the manuscript and prefer to submit it to another journal, please notify me of your decision immediately so that the manuscript may be formally withdrawn from consideration by Microbiology Spectrum.

If your manuscript is accepted for publication, you will be contacted separately about payment when the proofs are issued; please follow the instructions in that e-mail. Arrangements for payment must be made before your article is published. For a complete list of **Publication Fees**, including supplemental material costs, please visit our [website](#).

Corresponding authors may [join or renew ASM membership](#) to obtain discounts on publication fees. Need to upgrade your membership level? Please contact Customer Service at [Service@asmusa.org](mailto:Service@asmusa.org).

Thank you for submitting your paper to Microbiology Spectrum.

Dear Editor,

Thank you for the opportunity to respond to the reviewers' comments. Please find below a point-by-point response for your consideration. An updated manuscript and clean PDF have been submitted as indicated.

Reviewer comments:

**Reviewer #1 (Comments for the Author):**

Summary

This manuscript discusses the evaluation of COVID-19 serology test kits. Initially, rapid serology tests emerged following the recognition of the novel coronavirus (SARS-CoV-2) in November 2019, with limited regulatory oversight. The National Serology Reference Laboratory (NRL) in Australia conducted a comprehensive study to assess the performance of 16 IgG or Total antibody test kits. Key findings from the evaluation include: Most test kits for detecting IgG or total antibodies exhibited good concordance with recent infection, with the Ortho VITROS Total kit performing exceptionally well. Test kits generally demonstrated high clinical specificity, although there were slight variations, with some kits reporting lower specificity. Variability in analytical sensitivity was observed between test kits and sample dilutions, but no significant differences were found between different lot numbers of the same test kit. Some test kits showed cross-reactivity with certain substances, but most had low rates of false reactivity.

The manuscript highlights the importance of rigorous evaluation protocols, especially during health emergencies, to ensure the reliability of diagnostic tests. It also emphasizes the need for improved regulatory standards and a network of expert laboratories to respond swiftly to future outbreaks.

Major Concerns

- Overall, the methods are vague. It seems there was likely an intention to cite previous work to save space in the manuscript but I don't see any citations in the methods.

**Author** - *Indeed Reviewer 1 is correct in that the intention was to cite previous study also published in Spectrum (Reference 17). It was determined that a detailed repetition of the panel design was not required. However, on re-reading the submitted version of this publication, the previous study, while referenced, was not sufficiently clear.*

*To rectify this, we have added reference 17 to the first sentence of "Sample panels" section of "Methods", which reads "The panels of samples used in the study is presented in detail elsewhere".*

*In addition, in the second sentence of paragraph two of the "Introduction", we have added extra information highlighted in bold "In addition to this WHO study, NRL offered a similar evaluation service to other manufacturers of laboratory-based, automated SARS-CoV-2 serology tests, **drawing from the same panels of samples.**"*

o Study protocol, sample info (no citation), panels

**Author** - *As above*

- While the overall message that improved regulatory standards are needed as tests were created quickly, perhaps haphazardly, and pushed out under emergency use authorization remains the same, it is notable that the number of samples and the limited patient population largely impact the generalizability of the study. Given that in addition to the higher performing tests in this manuscript compared to the previous 35 assays studied, I would urge the authors to consider adding a reasonable amount of samples throughout the pandemic's variant waves.

**Author** – *The study was conducted at the time of the emergence of the pandemic and represents one of the most comprehensive such studies published, especially when combined with the previously reported rapid test evaluation. Although the Reviewer's comments are valid, as this study included positive samples containing antibodies derived only from individuals infected with the original Wuhan Strain and does not consider the performance of these test kits to detect antibodies derived from an evaluation of new VoC, or from different vaccines or vaccination programs. However, we would argue that this study acts a bench-mark. It may be useful to have future similar studies focusing on different origins of antibodies, but that was out of scope for this study, and was not available at the time due to the stage of the pandemic.*

#### Minor Concerns

- Limited patient population. 199 commercially acquired from non-hospitalized patients from the USA or Germany.

**Author** – *As discussed above, this study serves as a bench-mark. Its aim was to compare the performance of test kits using the same panel of samples. Access to high volume samples during a pandemic was challenging and costly. Ideally, samples from many countries may have been advantageous. The number of samples (n=199), however is not problematic as this number of samples allows for adequate confidence to assess sensitivity. Notwithstanding, we have added a sentence **"A limitation of this study is that it used commercially acquired from non-hospitalized patients from the USA or Germany in the panel of positive samples, acquired early in the pandemic. Therefore, the SARS-CoV-2 antibodies detected were post infection with the Wuhan strain. The ability of these assay to detect antibodies arising from infections with other variants of concern or post immunisation was not assessed"** at the end of the second last paragraph of the discussion.*

- Limited diversity of viral strains in samples due to limited timeframe of Jan to April of 2020. This lowers the generalizability of the results to an early stage of the pandemic.

**Author**- *addressed above*

- The discussion section should include a paragraph about study limitations that should include the two bullets above as well as others readers may not know from reading the manuscript.

**Author**- *addressed above*

Reviewer #2 (Comments for the Author):

Thank you for this excellent overview of major automated serological testing methods for relevant antibodies to SARS-CoV-2. It provides a useful and meaningful framework for assessing local real-life clinical laboratory medical practice experience employing any of these methods and instrument systems. It really puts in perspective the challenges of serological testing for infectious diseases which you have pointed out so clearly in your review published in 2021. It helps to answer frequent concerns with serological test results raised by clinicians and epidemiologists.

Specific comments on the content:

Check line 134 for possible spelling error: RTD for RDT?

**Author - corrected**

Lines: 92-99 Cross-reacting and interfering substances.

I miss the specific analytical methods of assays with cross reactive results and the identification of the specific interfering substances affecting the assays mentioned in your discussion. Adding these to the tables would add value to clinical laboratory medicine practitioners.

**Author –** *The specific cross reacting and interfering substances that were mentioned in the results section are added under “Cross-reacting and interfering substances” in the “Results” section. The tests mentioned in the discussion were from the other, sister study previously published.*

Lines 119-120: "... the utility of these tests was unknown at the time.." There was no consensus on the proper utilization of the serological tests at a time when the real need was for a reliable diagnostic test. Promoting serological testing then was difficult because of the potential false negatives during early infection which would have been disastrous. It was clear from the start that seroprevalence would have been useful. If testing had been done earlier human to human transmission would have been recognized earlier. Another point on medical utility of serological testing early during a new epidemic is the selection of high immune responders (plasma with high antibody titers) as potential donors of convalescent plasma for treatment of severe COVID-19 patients. Another major concern then was the cost of serological testing as pointed out in your first reference (1). The potential benefits for serological testing are well described in your reference 19.

**Author –** *We agree with the comments of Reviewer 2. In retrospect, seroprevalence studies and the possibility of identifying high immune responder samples were possible uses for serology. The comment was meant to indicate the “diagnostic” utility of antibody testing was unknown. I have added “**diagnostic utility**” to clarify.*

Re: Spectrum03228-23R1 (Comprehensive, Comparative Evaluation of 25 Automated SARS-CoV-2 Serology Assays)

Dear Dr. Wayne Dimech:

Your manuscript has been accepted, and I am forwarding it to the ASM production staff for publication. Your paper will first be checked to make sure all elements meet the technical requirements. ASM staff will contact you if anything needs to be revised before copyediting and production can begin. Otherwise, you will be notified when your proofs are ready to be viewed.

**Data Availability:** ASM policy requires that data be available to the public upon online posting of the article, so please verify all links to sequence records, if present, and make sure that each number retrieves the full record of the data. If a new accession number is not linked or a link is broken, provide production staff with the correct URL for the record. If the accession numbers for new data are not publicly accessible before the expected online posting of the article, publication may be delayed; please contact ASM production staff immediately with the expected release date.

**Publication Fees:** For information on publication fees and which article types have charges, please visit our [website](#). We have partnered with Copyright Clearance Center (CCC) to collect author charges. If fees apply to your paper, you will receive a message from no-reply@copyright.com with further instructions. For questions related to paying charges through RightsLink, please contact CCC at ASM\_Support@copyright.com or toll free at +1-877-622-5543. CCC makes every attempt to respond to all emails within 24 hours.

**ASM Membership:** Corresponding authors may [join or renew ASM membership](#) to obtain discounts on publication fees. Need to upgrade your membership level? Please contact Customer Service at Service@asmusa.org.

**PubMed Central:** ASM deposits all Spectrum articles in PubMed Central and international PubMed Central-like repositories immediately after publication. Thus, your article is automatically in compliance with the NIH access mandate. If your work was supported by a funding agency that has public access requirements like those of the NIH (e.g., the Wellcome Trust), you may post your article in a similar public access site, but we ask that you specify that the release date be no earlier than the date of publication on the Spectrum website.

**Embargo Policy:** A press release may be issued as soon as the manuscript is posted on the [Spectrum Latest Articles webpage](#). The corresponding author will receive an email with the subject line "ASM Journals Author Services Notification" when the article is available online.

The ASM Journals program strives for constant improvement in our submission and publication process. Please tell us how we can improve your experience by taking this quick [Author Survey](#).

Thank you for submitting your paper to Spectrum.

Sincerely,  
Oliver Laeyendecker  
Editor  
Microbiology Spectrum
